# Supplementary material for: Evaluation of the Preclinical Efficacy of Lurbinectedin in Malignant Pleural Mesothelioma
Source: MDPI journal article supplement (doi:10.3390/cancers13102332), 2021-05-12

## Whole blots Figure 1D (X-ray film development)

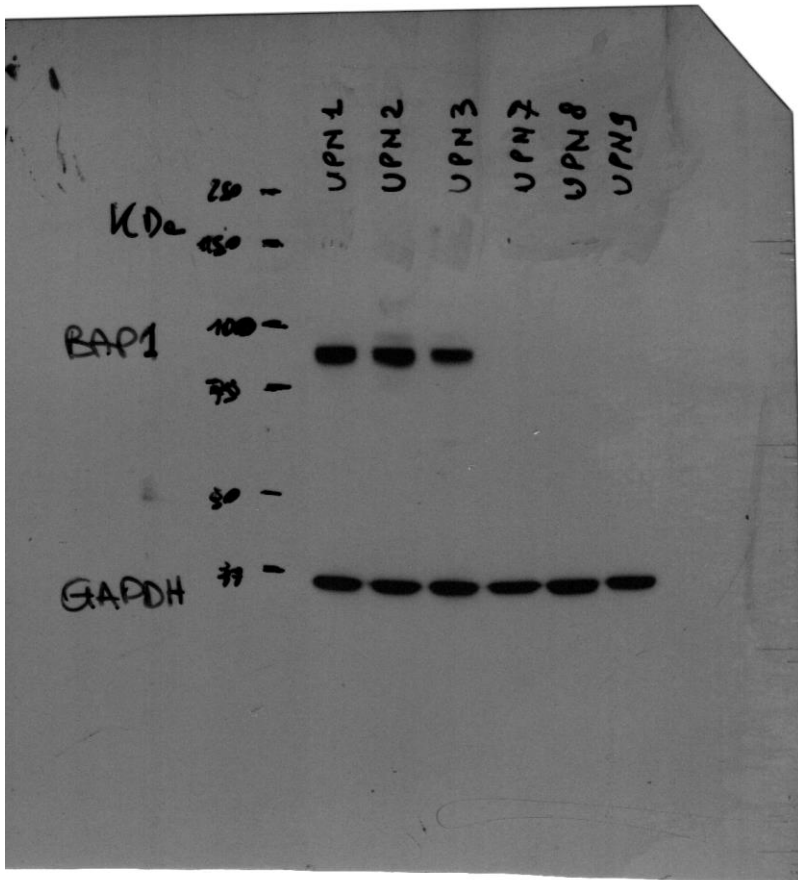

## Densitometry analysis Figure 1D

(ImageJ software: <https://imagej.nih.gov/ij/>)

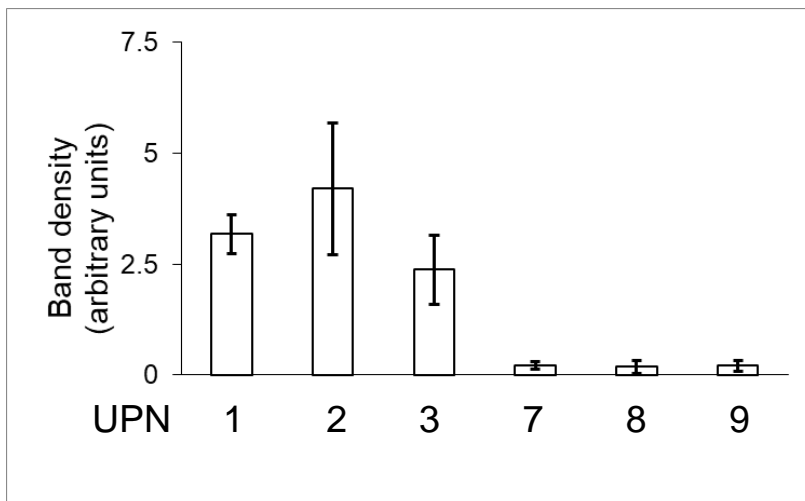

Whole blots Figure 5C-D (X-ray film development): UPN1, UPN7

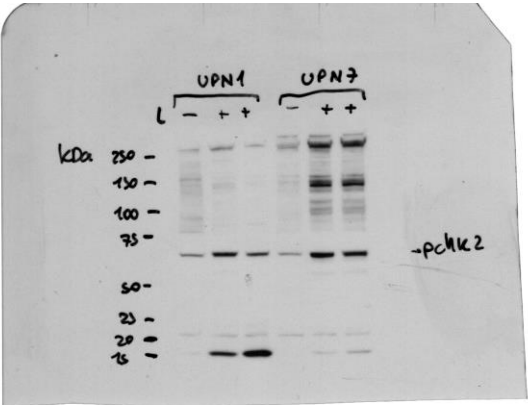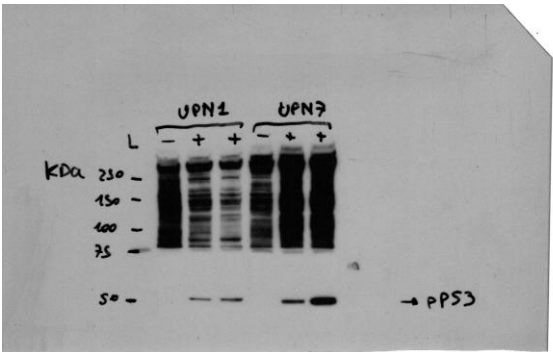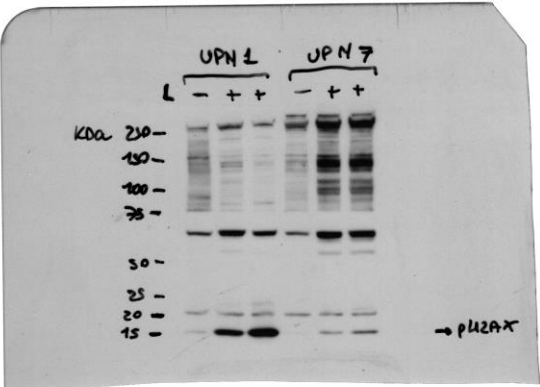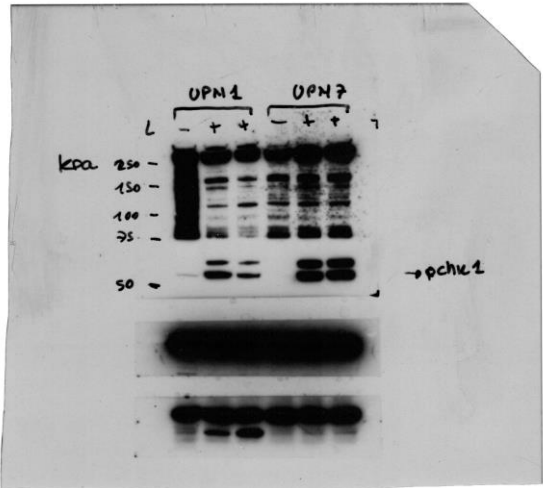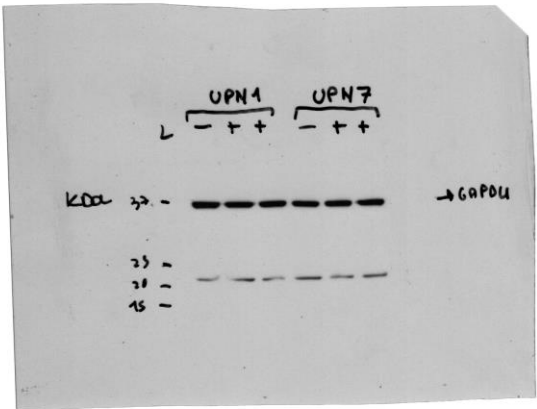

# Whole blots Figure 5C-D (X-ray film development): UPN2, UPN8

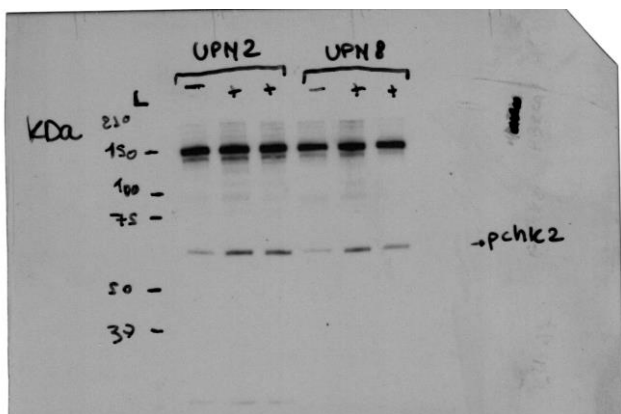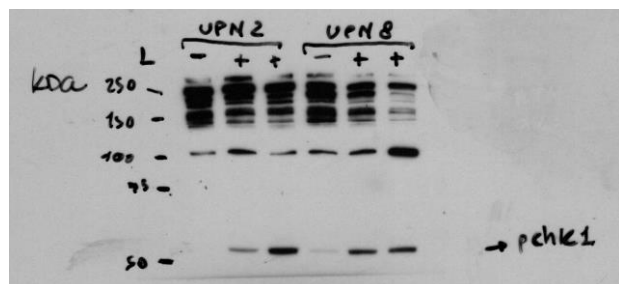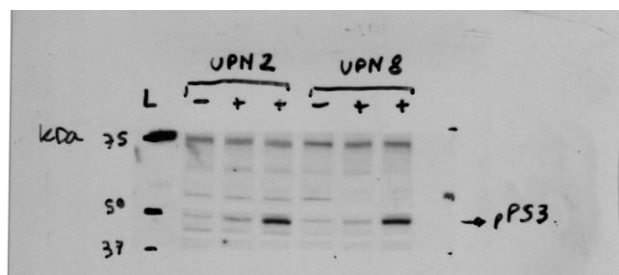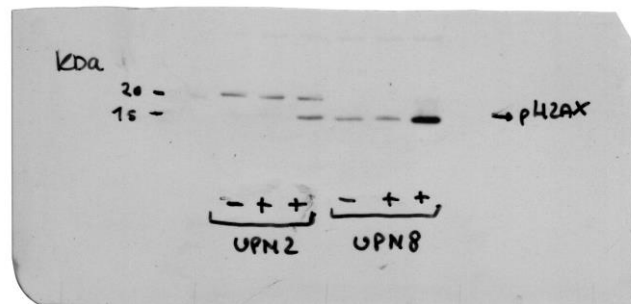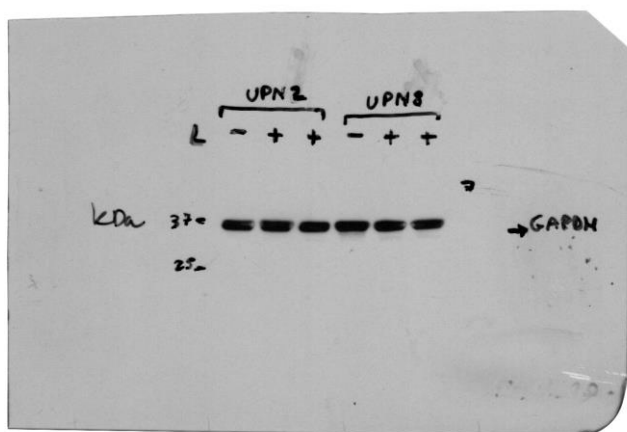

# Whole blots Figure 5C-D (X-ray film development): UPN3, UPN9

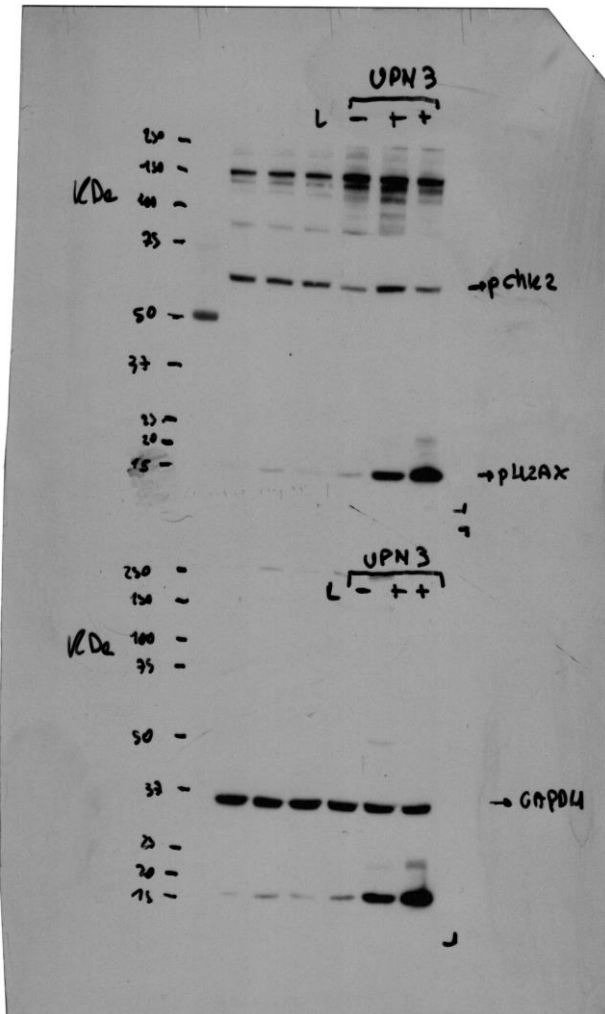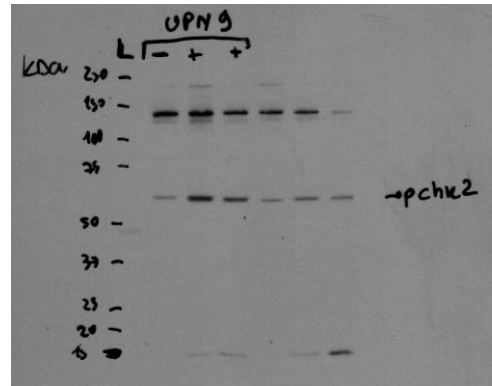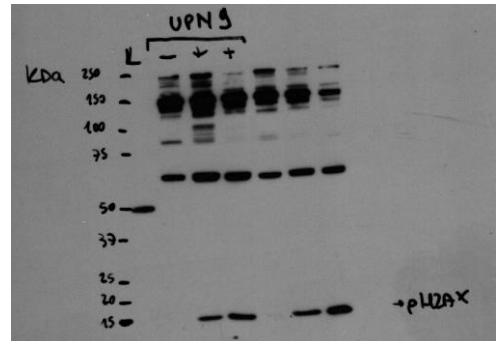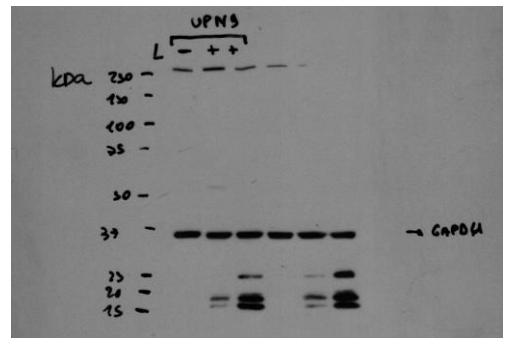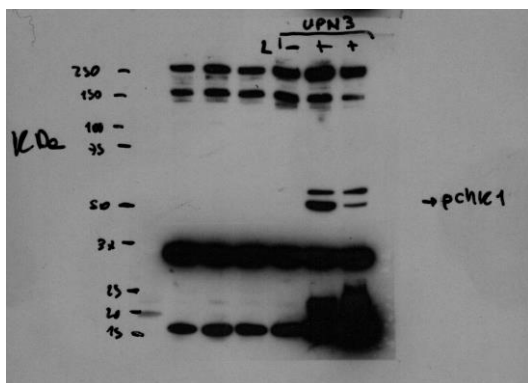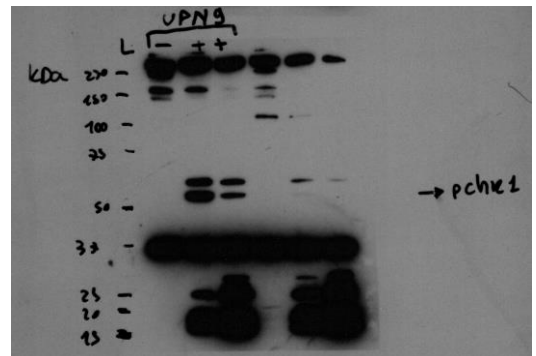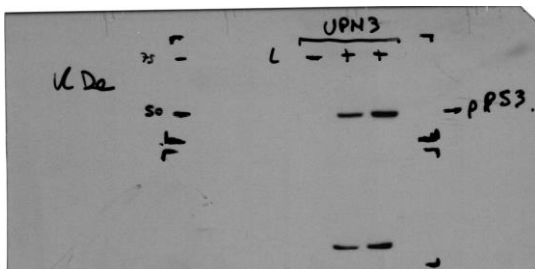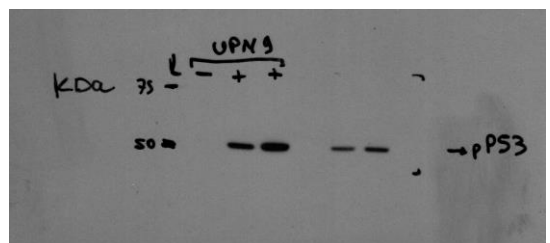

Densitometry analysis Figure 5C-D  
(ImageJ software:<https://imagej.nih.gov/ij/>)

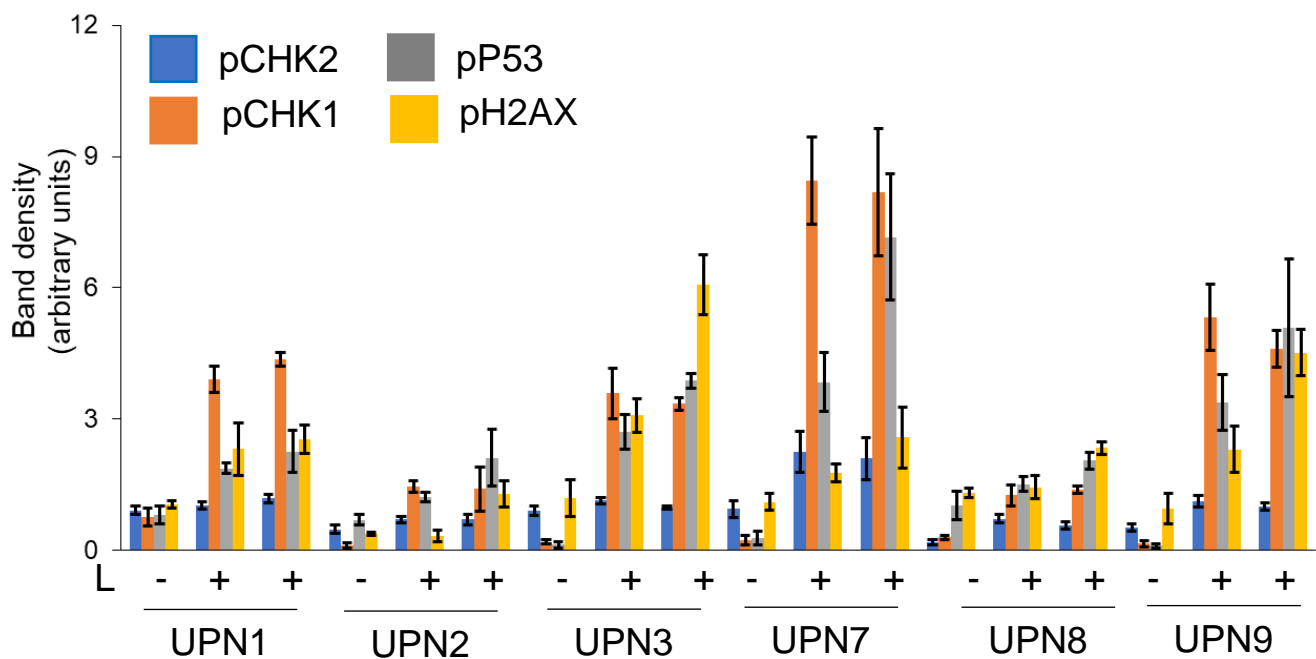

Whole blots Figure 6C-D: digital camera development  
(ChemiDoc, Bio-Rad)

UPN1

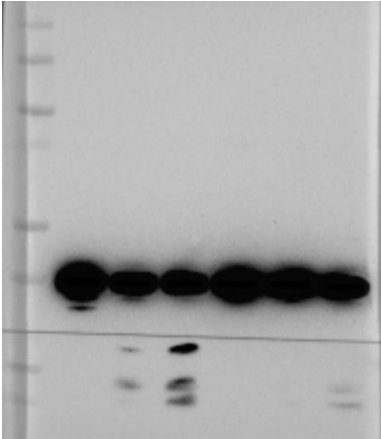

cl. casp 3

UPN7

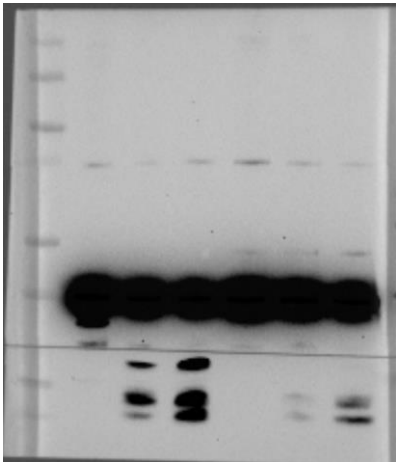

cl. casp 3

UPN1

UPN7

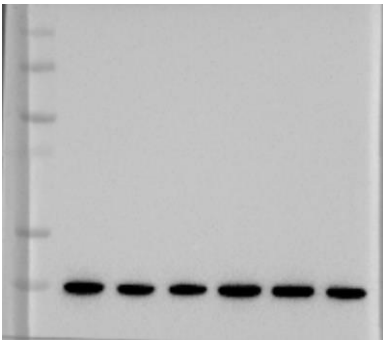

GAPDH

Whole blots Figure 6C-D: digital camera development  
(ChemiDoc, Bio-Rad)

UPN2

UPN8

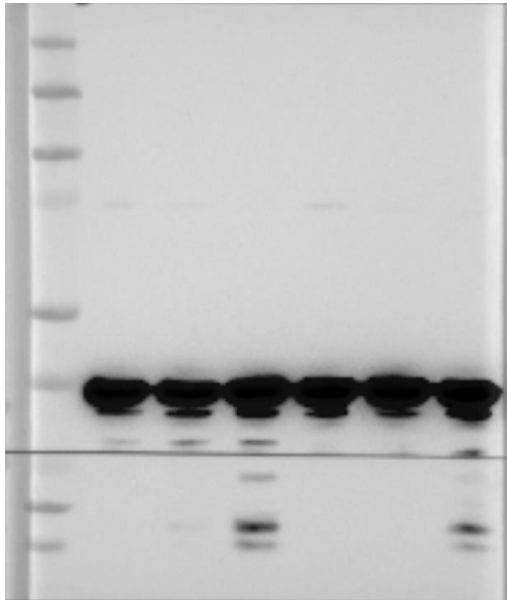

cl. casp 3

UPN2

UPN8

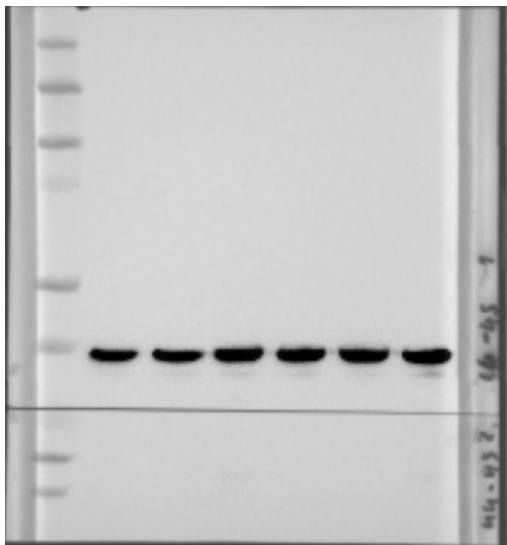

GAPDH

Whole blots Figure 6C-D: digital camera development  
(ChemiDoc, Bio-Rad)

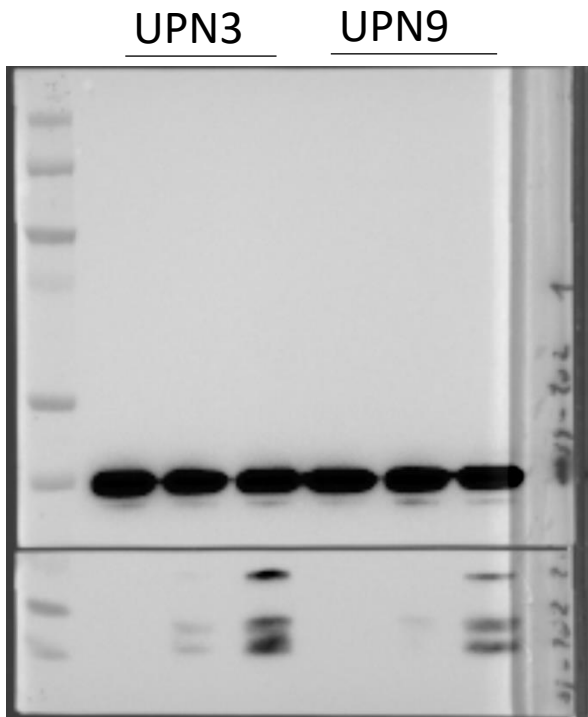

cl. casp 3

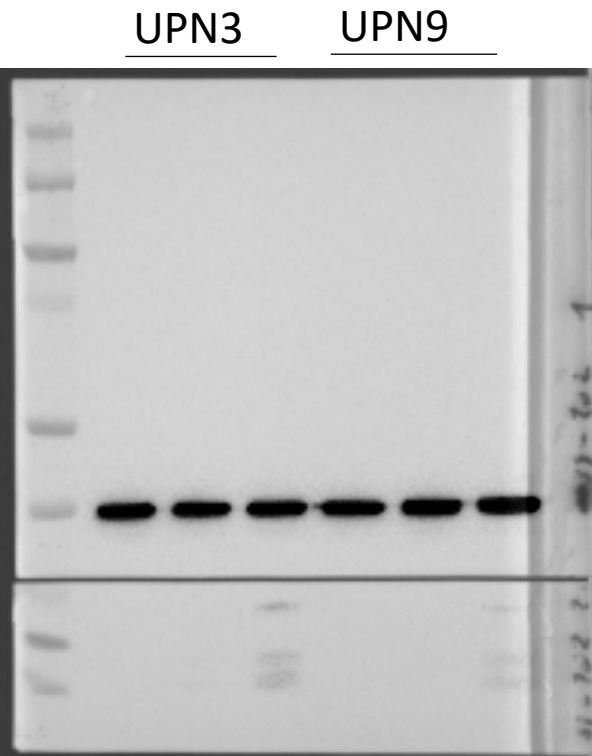

GAPDH



Densitometry analysis Figure 6C-D  
(ImageJ software:<https://imagej.nih.gov/ij/>)

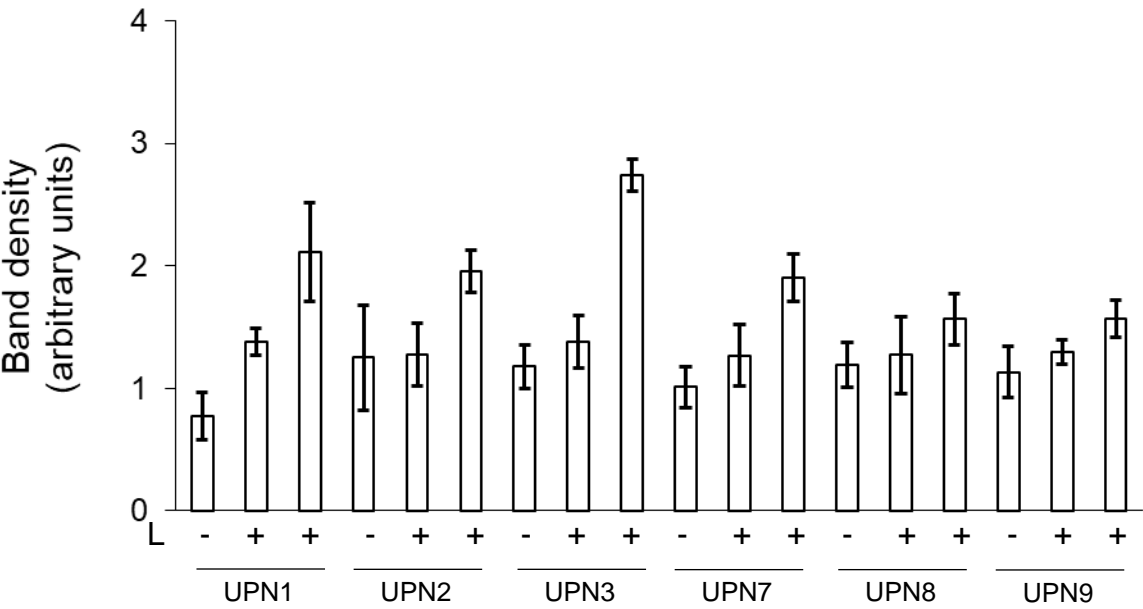

Supplement: s1 [file s1]
