# Supplementary material for: Evaluation of the Preclinical Efficacy of Lurbinectedin in Malignant Pleural Mesothelioma
Source: MDPI journal article supplement (doi:10.3390/cancers13102332), 2021-05-12
Supplement: s1 [file s1]

# Evaluation of the preclinical efficacy of lurbinectedin in malignant pleural mesothelioma

Supplementary Figure S1

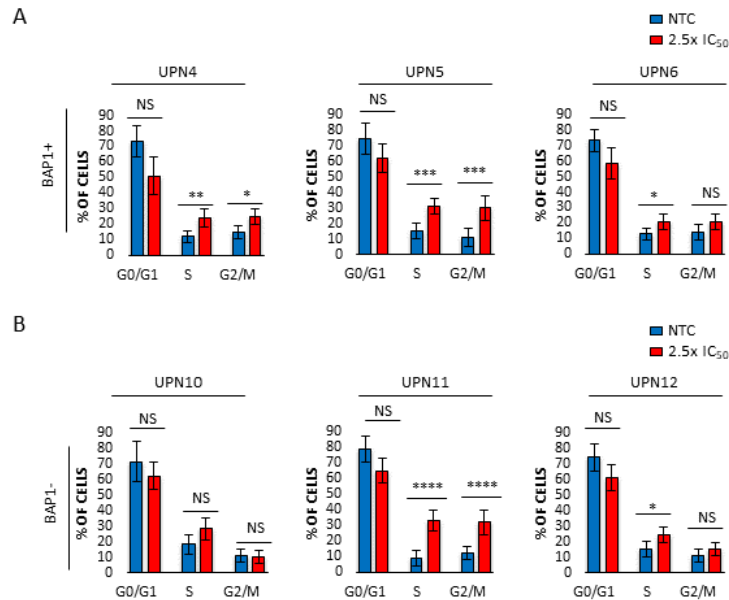

**Supplementary Figure S1.** Lurbinectedin effects on cell cycle distribution. **(A,B)** Histograms showing cell number percentage in each cell cycle phase (G0/G1, S and G2/M) of the indicated MPM cell lines, treated or not with lurbinectedin (2.5-fold the IC<sub>50</sub>) for 24h. Data are expressed as means  $\pm$  SEM; <sup>NS</sup>P>0.05; \* p < 0.05; \*\* p < 0.01; \*\*\* p < 0.001; \*\*\*\* p < 0.0001

## Supplementary Figure S2

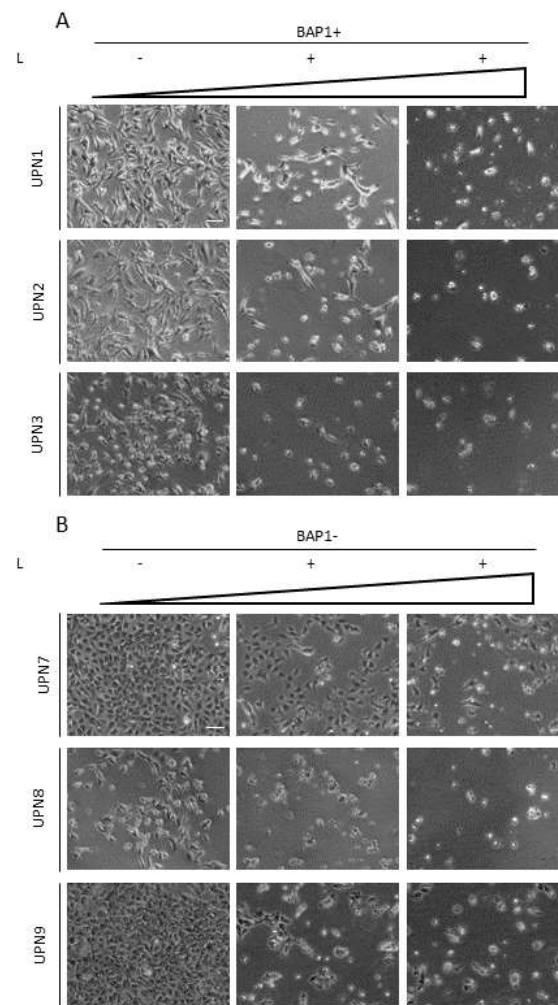

**Supplementary Figure S2.** Lurbinedin strongly impairs cell viability in MPM cell lines. (A,B) Representative microscopic images of the indicated MPM cell lines treated or not with two different lurbinedin (L) concentrations (2.5-fold and 5-fold the  $IC_{50}$ ) for 72h (scale bar = 100 $\mu$ m).

**Table S1.** Histological features of the original tumors, clinical features and treatments subsequently received of the corresponding patients

| UPN | Histotype   | BAP1 | Gender | Age | Asbestos exposure | Surgery | First-line treatment | Second-line treatment | OS (months) |
|-----|-------------|------|--------|-----|-------------------|---------|----------------------|-----------------------|-------------|
| 1   | epithelioid | POS  | M      | 78  | Possible          | No      | Palliative           | No                    | 6           |
| 2   | epithelioid | POS  | M      | 69  | Yes               | Yes*    | No                   | No                    | 12          |
| 3   | epithelioid | POS  | M      | 70  | Yes               | Yes*    | No                   | No                    | 3           |
| 4   | epithelioid | POS  | M      | 79  | Possible          | No      | Carbo+Pem            | Gem                   | 16          |
| 5   | epithelioid | POS  | M      | 68  | Yes               | No      | Carbo+Pem            | Pem                   | 9           |
| 6   | sarcomatoid | POS  | M      | 69  | Yes               | No      | Carbo+Pem            | Trabectedin           | 10          |
| 7   | sarcomatoid | NEG  | M      | 77  | Yes               | No      | No                   | No                    | 3           |
| 8   | epithelioid | NEG  | M      | 53  | Yes               | Yes     | No                   | No                    | 13          |
| 9   | epithelioid | NEG  | M      | 74  | NR                | No      | Carbo+Pem            | No                    | 13          |
| 10  | epithelioid | NEG  | F      | 46  | Yes               | No      | Carbo+Pem            | Trabectedin           | 12          |
| 11  | biphasic    | NEG  | M      | 60  | Yes               | No      | Carbo+Pem            | Gem+Vin               | 23          |
| 12  | sarcomatoid | NEG  | F      | 80  | Yes               | No      | Carbo+Pem            | Trabectedin           | 5           |

POS: positive; NEG: negative; M: male; F: female; NR: not reported; Yes\*: Surgery + adjuvant platinum-based chemotherapy; n.a.: not available; Carbo: carboplatin; Pem: pemetrexed; Gem: gemcitabine; Vin: vinorelbine; OS: overall survival.
